# Supplementary material
Source: PubMed Central journal article supplement (PMC3190998)

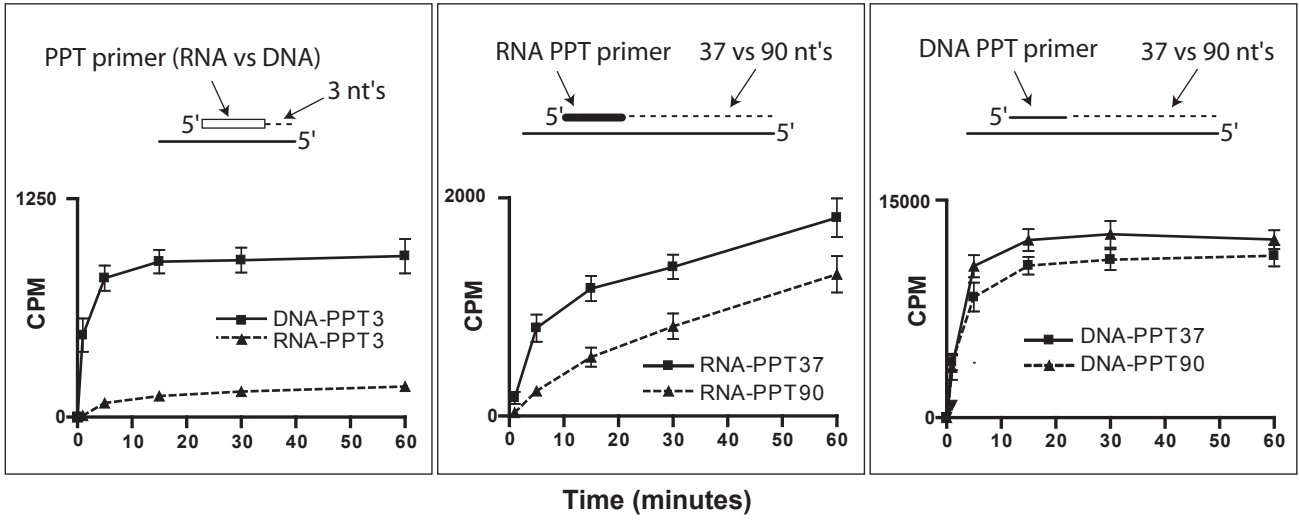

**Figure S1**

Supplement: supp_M111.268235_jbc.M111.268235-1.pdf [file supp_M111.268235_jbc.M111.268235-1.pdf]
